# Supplementary material for: SARS-CoV-2 seroprevalence in students and teachers: a longitudinal study from May to October 2020 in German secondary schools
Source: PubMed Central journal article supplement — BMJ Open. 2021 Jun 10;11(6):e049876. doi: 10.1136/bmjopen-2021-049876 (PMC8193693; doi:10.1136/bmjopen-2021-049876), 2021-06-10
Supplement: bmjopen-2021-049876supp001.pdf [file bmjopen-2021-049876supp001.pdf]

Supplemental table 1: seroprevalence based on different seropositivity definitions

|                                    | first study visit<br>(May/June) | second study visit<br>(September/October) |
|------------------------------------|---------------------------------|-------------------------------------------|
| >= 1 serological test<br>positive  | 22/2045 (1.1%)                  | 25/1779 (1.4%)                            |
| >= 2 serological tests<br>positive | 12/2045 (0.6%)                  | 12/1779 (0.7%)                            |
| 3 serological tests positive       | 9/2045 (0.4%)                   | 5/1779 (0.3%)                             |

Number of seropositive participants based on different definitions. Data is presented as numbers with percentages.
